# MIND TO MIND

Creative writing that explores the abstract side of our profession and our lives

*Stephen T. Harvey, M.D., Editor*

## Your Hair Will Grow Back a Poppyfield

Hannah Clarkson

Pen marked the footpaths  
of the incisions to your  
skull they planned to make the  
following week in the hope  
they could save you. It was  
so strange to see you head  
half-shaved and dashed with  
ink lines, as if the topography  
of you were so easy to  
trace. We draw ourselves  
out, lives in complicated lines,  
but perhaps we are quite  
simple after all. I wondered  
then if this would change  
you, if the you I knew  
would be cut upon and  
turn out not to be  
you at all. We  
are so fragile in our  
assertions, though we claim  
to be so strong. It feels  
wrong that we could have  
ever been so sure.  
On fitful nights I  
imagine what would

This poem is one of the finalists of Anesthesiology's 2019 annual creative writing competition, The Letheon. hannahclarkson@hotmail.co.uk

Accepted for publication January 15, 2020. Published online first on February 6, 2020.

Permission to reprint granted to the American Society of Anesthesiologists, Inc. by copyright author/owner. Anesthesiology 2020; 132:925–6. DOI: 10.1097/ALN.0000000000003187

happen if they reassembled  
your jigsawed skull differently,  
or solved the puzzle of you  
another way. That man  
with lines mapped on bone  
became so distant to me  
in those moments, though  
the infinitesimal accuracy of barely  
millimeters foretold of  
steady hands and inroads  
many times gone.  
A week, and I've already lost you.  
In the same room I  
wake up as you go under,  
and I anticipate the  
strangeness I will meet  
when deconstruction is done.  
Your hair will grow back a  
poppyfield to cover all this day  
has exposed. The part of you  
they take will be my memory.  
Together in reconstructed trust  
we will grow old.
